# Supplementary material for: Genome-wide search for Zelda-like chromatin signatures identifies GAF as a pioneer factor in early fly development
Source: PubMed Central journal article supplement (PMC5496641; doi:10.1186/s13072-017-0141-5), 2017-07-04

# Supplemental Figure 6

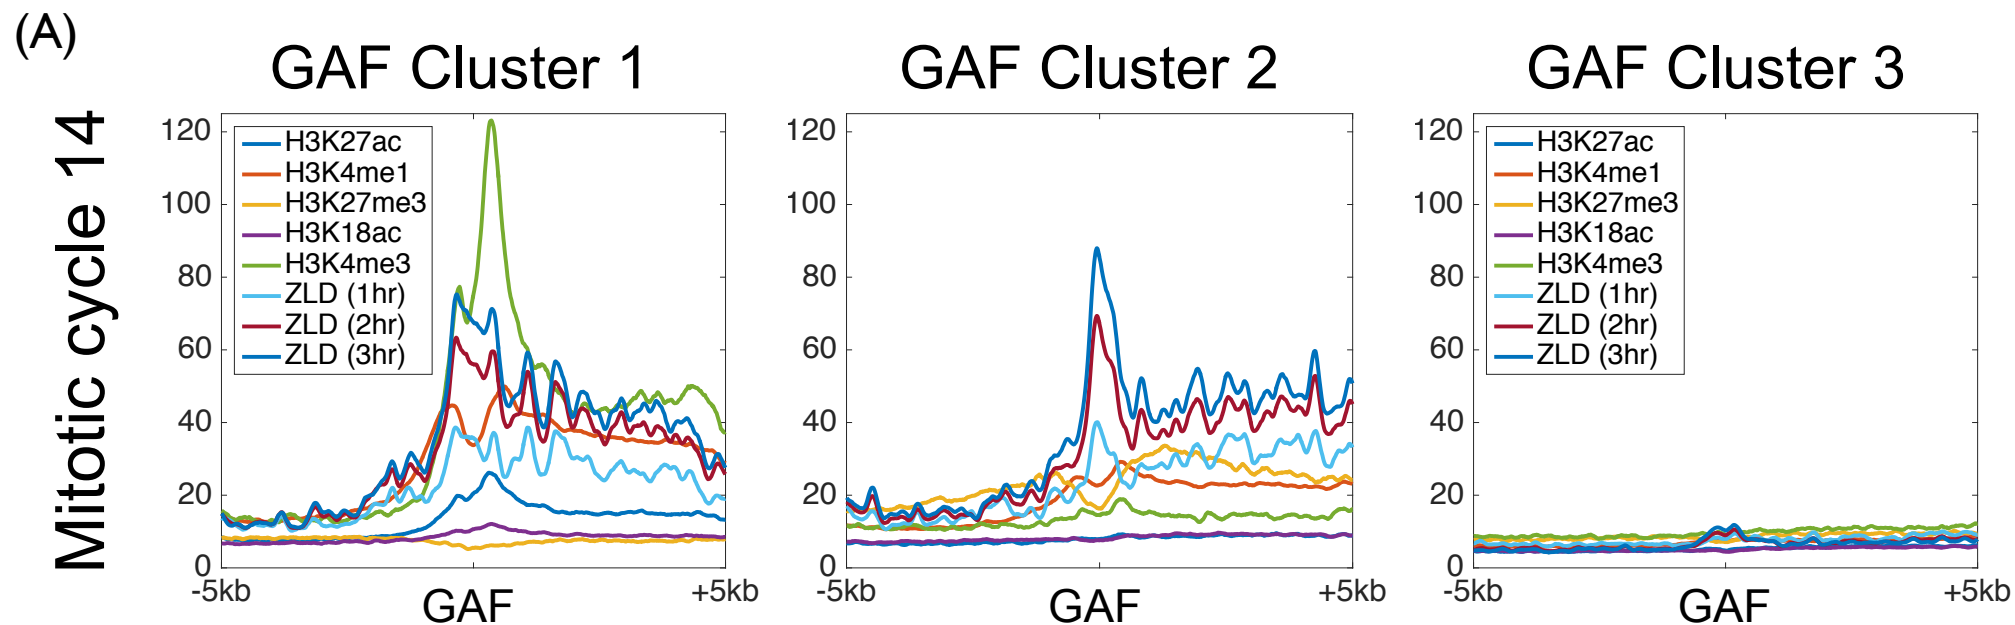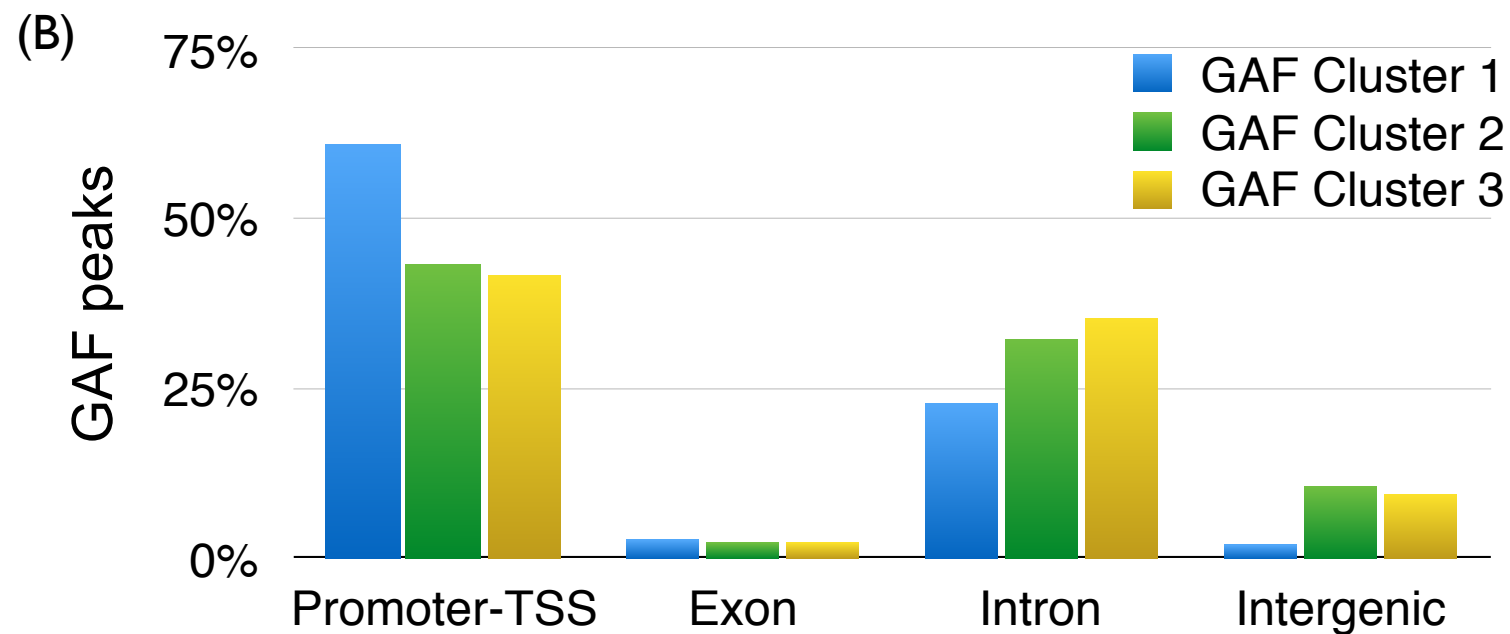

Supplement: 13072_2017_141_MOESM6_ESM.pdf [file 13072_2017_141_MOESM6_ESM.pdf]
